# Supplementary material for: Development and Validation of a Taxonomy for Characterizing Measurements in Health Self-Quantification
Source: PubMed Central journal article supplement (PMC5694028; doi:10.2196/jmir.6903), 2017-11-03
Supplement: jmir_v19i11e378_app1.pdf [file jmir_v19i11e378_app1.pdf]

## Appendix 1: List of SQ tools available at self-quantification Lab

The table below presents a list of all SQ devices available at Health and Biomedical Informatics Centre at the University of Melbourne self-quantification Lab since 2013.

| Data type                                | SQ Device                                                          |
|------------------------------------------|--------------------------------------------------------------------|
| <b>Physical Activity</b>                 | Body Media FIT                                                     |
|                                          | Body Media FIT Wearable Display - BS100735                         |
|                                          | BodyMedia FIT + Armband + Display BS 100734                        |
|                                          | BodyMedia FIT Display Wristband Accessory - BS100179               |
|                                          | Fitbit Flex                                                        |
|                                          | Fitbit Zip                                                         |
|                                          | Fitbit Zip Wireless Activity Tracker                               |
|                                          | iWatch                                                             |
|                                          | Jawbone Up                                                         |
|                                          | Misfit Shine                                                       |
|                                          | Phyode W/Me Tracker                                                |
|                                          | Polar RCXBike                                                      |
|                                          | Samsung Galaxy Gear Smartwatch                                     |
|                                          | Sense U Activity                                                   |
|                                          | Suunto Ambit2GPS+Hearth Rate Monitor Watch                         |
| Withings Pulse Wireless                  |                                                                    |
| <b>Weight</b>                            | Accumeasure Fitness 3000 Body Fat Tester                           |
|                                          | Fitbit Aria Wi-Fi Smart Scale - FB201B                             |
|                                          | Withings Smart Body Analyzer                                       |
| <b>Sleep</b>                             | Fitbit One Wireless Activity and Sleep Tracker - FB                |
|                                          | Lark Pro Sleep Monitor Silent Alarm Clock and Personal Sleep Coach |
|                                          | Renew Sleep Clock - PG 754                                         |
|                                          | Sleep Tracker                                                      |
|                                          | Zeo Mobile Sleep Management System ZEOMBL1 + docking station       |
| <b>Blood</b>                             | Beurer Mobile ECG Device - ME80                                    |
|                                          | Beurer Upper Arm Digital Blood Pressure Monitor - BM58             |
|                                          | Garmin Forerunner Heart Rate Monitor                               |
|                                          | IBGStar Blood Glucose Meter Kit                                    |
|                                          | iHealth Wireless Blood Pressure Monitor Upper Arm Cuff - IH-BP5    |
|                                          | iHealth Wireless Pulse Oximeter - IH-PO3                           |
|                                          | Tinke Heart Rate Monitor - 2414458                                 |
|                                          | Viiiiva Dual Heart rate Monitor                                    |
|                                          | Withings Blood Pressure Monitor                                    |
| <b>Environment</b>                       | Tempe Wireless Temperature                                         |
|                                          | Lapka Personal Environment Monitor for iPhone                      |
| <b>Respiratory</b>                       | Airsona                                                            |
| <b>Brain</b>                             | Mind Reflector                                                     |
|                                          | Mindwave Mobile                                                    |
| <b>Posture</b>                           | LUMO - Back Posture Sensor                                         |
| <b>Microbial structure in human body</b> | WiTouch Pro Tens - Pain Management                                 |
|                                          | ubiome                                                             |
| <b>Cell structure</b>                    | 23andMe                                                            |
