# Supplementary material for: Development and Validation of a Taxonomy for Characterizing Measurements in Health Self-Quantification
Source: PubMed Central journal article supplement (PMC5694028; doi:10.2196/jmir.6903), 2017-11-03
Supplement: jmir_v19i11e378_app4.pdf [file jmir_v19i11e378_app4.pdf]

## Appendix 4: Applicability of CDA-SQS

| <b>Domain</b>                          |                                                                                     |                                                                                                                                                                                 |
|----------------------------------------|-------------------------------------------------------------------------------------|---------------------------------------------------------------------------------------------------------------------------------------------------------------------------------|
| <b>Category</b>                        | <b>Sub-category</b>                                                                 | <b>Primary SQ tools/services</b>                                                                                                                                                |
| <b>Body functions</b>                  |                                                                                     |                                                                                                                                                                                 |
| Mental functions                       | Attention including: concentration; sharing attention, etc.                         | Melon                                                                                                                                                                           |
|                                        | Sleep                                                                               | Lark<br>SleepCycle,<br>SleepTracker<br>WakeMate<br>Zeo Sleep Manager                                                                                                            |
|                                        | Emotions                                                                            | Emotiv Insight<br>Happiness<br>MercuryApp<br>Moodjam<br>MoodPanda<br>MoodScope<br>TrackYourHappiness                                                                            |
|                                        | Thought including: flight of ideas, thought block, productivity, meditation, etc.   | Muse<br>Quantified Mind<br>RescueTime                                                                                                                                           |
| Functions of the cardiovascular system | Blood pressure                                                                      | A&D Blood Pressure Monitor<br>Actipressure<br>Blipcare<br>Blood Pressure Companion<br>iHealth                                                                                   |
|                                        | Heart functions e.g., heart rate, rhythm and output                                 | Adidas miCoach<br>Alivecor<br>Basis<br>Cardiio<br>EmWave2<br>Garmin Heart Rate Monitor<br>Ithlete<br>Mio<br>Myithlete<br>NeuroSky<br>Polar<br>Tinke<br>Wahoo Heart Rate Monitor |
| Endocrine system functions             | Hormonal levels in the body (Blood glucose)                                         | CareLogger<br>Dexcom<br>Glooko<br>iBGStar                                                                                                                                       |
| Reproductive functions                 | Menstruation including regularity of menstruation and discharge of menstrual fluids | Clue for tracking cycles<br>Free Menstrual Calendar<br>My Cycles Period and Ovulation Tracker<br>MyFertilityMD                                                                  |
| Sensory functions                      | Senses e.g. seeing, hearing, tasting, smell, touch                                  | EyeNetra                                                                                                                                                                        |
| Sensation of pain                      | Pain in back, chest, head, etc.                                                     | Symple<br>TrackNShare                                                                                                                                                           |
| <b>Body structures</b>                 |                                                                                     |                                                                                                                                                                                 |
| Cell structure                         | Genes, DNA, RNA, etc.                                                               | 23andMe<br>Eclipse for self breast exam                                                                                                                                         |

|                                                     |                                                                                                                     |                                                                                                                                                                                                                                                                                                                          |
|-----------------------------------------------------|---------------------------------------------------------------------------------------------------------------------|--------------------------------------------------------------------------------------------------------------------------------------------------------------------------------------------------------------------------------------------------------------------------------------------------------------------------|
|                                                     |                                                                                                                     | InsideTracker<br>Talking20<br>WellnessFX                                                                                                                                                                                                                                                                                 |
| Microbial structure in skin, gut, etc.              | Names, number, types, etc.                                                                                          | uBiome                                                                                                                                                                                                                                                                                                                   |
| Neuromusculoskeletal and movement-related functions | Mobility of bone; joints; muscles                                                                                   | LumoBack<br>MYO                                                                                                                                                                                                                                                                                                          |
| <b>Body actions and activities</b>                  |                                                                                                                     |                                                                                                                                                                                                                                                                                                                          |
| Mobility                                            | Climbing, crawling, jogging, running, swimming, walking, etc.                                                       | Amiigo<br>Bodymedia<br>Endomondo<br>Fitbit One<br>Fitbit Ultra<br>Fitbit Zip<br>Fitocracy<br>Garmin watch<br>iSki Tracker<br>Jawbone Up<br>Misfit Shine<br>Moves<br>MyFitnessPal<br>Nike Fuelband<br>Nike Hyperdunk<br>Nike+ Running<br>Omron<br>Pebble<br>RunKeeper<br>Runtastic<br>Strava<br>Wahoo Fitness<br>Withings |
| Self-care                                           | Weight maintenance                                                                                                  | Fitbit Aria scale<br>Fitorbit<br>Lose It!<br>Retrofit<br>Withings scale                                                                                                                                                                                                                                                  |
|                                                     | Diet                                                                                                                | 80 Bites<br>Dan's Plan<br>Hapilabs fork<br>mySymptoms<br>NutriMirror                                                                                                                                                                                                                                                     |
|                                                     | Consumption of drug or medicine                                                                                     | Medisafe Project<br>Medminder<br>Spectracell<br>Vitality Glowcaps                                                                                                                                                                                                                                                        |
|                                                     | Washing and drying oneself includes: washing body parts, washing whole body                                         | Toothbrush app                                                                                                                                                                                                                                                                                                           |
| Religion and spirituality                           | Engaging in religious or spiritual activities                                                                       | Equanimity Meditation Timer & Tracker                                                                                                                                                                                                                                                                                    |
| <b>Around body</b>                                  |                                                                                                                     |                                                                                                                                                                                                                                                                                                                          |
| Natural and built environment                       | Climate/weather e.g. temperature, humidity, atmospheric pressure, precipitation, wind and seasonal variations, etc. | Lapka<br>Nest<br>Netatmo<br>Sensaris Senspod                                                                                                                                                                                                                                                                             |
|                                                     | Place e.g. Locate the places you want to go to and                                                                  | Chronos<br>Garmin GPS                                                                                                                                                                                                                                                                                                    |

|                                  |                                                                                                                                                                         |                                            |
|----------------------------------|-------------------------------------------------------------------------------------------------------------------------------------------------------------------------|--------------------------------------------|
|                                  | directions.                                                                                                                                                             | Geonaute Keymaze<br>Placeme<br>WorkInField |
| Major life areas                 | Economic self-sufficiency to ensure economic security for present and future needs                                                                                      | Mint<br>Slice<br>TheBirdy<br>TOSHL finance |
| Products and technologies        | Use of products and technologies in activities of moving inside and outside buildings e.g. buses, cars, vans, airplanes, etc.                                           | TripIt flights                             |
| Relationships and attitudes      | Personal care providers and personal assistants who function as primary caregivers.                                                                                     | BabyWatch                                  |
| Community, social and civic life | Socialising and volunteering includes: engaging in charitable organizations, service clubs or professional social organizations, informal and formal associations; etc. | Momento Events Tracker                     |

The remaining SQS (N=22: 42Goals, AskMeEvery, ChartMySelf, DailyBurn, Daytum, Garmin MyConnect, Google Forms, KeepTrack, Lift, Reporter, and self-created tracker application, Dacadoo, Digifit, Fluxstream BodyTrack, Notch.Me, Open.Sen.Se, self-created application, Statwing, Tictrac, TRAQS.me, Zenobase, and Zoomdata) were found to capture a range of health aspects that belong to more than one health domain as denoted by the CDA-SQS; thus for the sake of clarity, they were listed in text but not presented in the above table.
